Anesthesiology  
1996; 85:755-60  
© 1996 American Society of Anesthesiologists, Inc.  
Lippincott-Raven Publishers

## Effects of Sevoflurane with and without Nitrous Oxide on Human Cerebral Circulation

### Transcranial Doppler Study

Sungsam Cho, M.D.,\* Toru Fujigaki, M.D.,† Yasue Uchiyama, M.D.,\* Makoto Fukusaki, M.D.,  
† Osamu Shibata, M.D.,‡ Koji Sumikawa, M.D.§

**Background:** This study was designed to evaluate the effects of sevoflurane with and without nitrous oxide on human middle cerebral artery (MCA) flow velocity, cerebrovascular carbon dioxide reactivity, and autoregulation compared with the awake state using transcranial Doppler ultrasonography.

**Methods:** In 14 patients, the time-mean middle cerebral artery flow velocity (Vmca) was measured when the end-tidal carbon dioxide level was approximately 30, 40, and 50 mmHg under the following conditions: (1) awake; (2) with 2% (1.2 MAC) sevoflurane; and (3) with 1.2 MAC sevoflurane-60% nitrous oxide. In six other patients, the cerebrovascular autoregulation during anesthesia was determined using intravenous phenylephrine to increase blood pressure.

**Results:** Sevoflurane (1.2 MAC) significantly decreased Vmca compared with the awake value at each level of end-tidal carbon dioxide, whereas 1.2 MAC sevoflurane-60% nitrous oxide did not exert significant influence. The Vmca in normocapnic patients decreased from 69 cm/s to 55 cm/s with 1.2 MAC sevoflurane and then increased to 70 cm/s when nitrous oxide was added. Sevoflurane (1.2 MAC) with and without 60% nitrous oxide had a negligible effect on cerebrovascular carbon dioxide reactivity. A phenylephrine-induced increase of mean arterial pressure did not influence Vmca during anesthesia.

**Conclusions:** Sevoflurane (1.2 MAC) reduced Vmca compared with the awake condition, whereas the addition of nitrous oxide caused Vmca to increase toward the values obtained in the awake condition. The cerebrovascular carbon dioxide reactivity and autoregulation were well maintained during 1.2 MAC sevoflurane with and without 60% nitrous

oxide. (Key words: Anesthetics, volatile: sevoflurane; nitrous oxide. Brain: blood flow velocity; carbon dioxide reactivity; autoregulation. Equipment: transcranial Doppler ultrasonography. Pharmacology: phenylephrine).

SEVOFLURANE is a new volatile anesthetic recently introduced into clinical practice in the United States. In animal experiments, sevoflurane decreased both cerebral blood flow (CBF) and cerebral metabolic rate for oxygen (CMRO<sub>2</sub>) in pigs,<sup>1</sup> whereas it decreased CMRO<sub>2</sub> but not CBF in rabbits<sup>2</sup> and dogs.<sup>3</sup> Kitaguchi and associates<sup>4</sup> studied the effects of sevoflurane on the cerebral circulation of patients with ischemic cerebrovascular disease and reported that carbon dioxide reactivity of CBF was well maintained during 1.5% (0.88 MAC) sevoflurane-33% nitrous oxide anesthesia. However, in their study, CBF in the awake state was not measured and the influence of nitrous oxide was not examined in patients without cerebrovascular disease.

Transcranial Doppler ultrasonography can measure the middle cerebral artery flow velocity continuously and noninvasively. Although the middle cerebral artery (MCA) flow velocity does not reflect the absolute CBF, the change in the MCA flow velocity is directly proportional to the change in the CBF.<sup>5,6</sup> The present study was designed to evaluate the effects of sevoflurane with and without nitrous oxide on human MCA flow velocity, cerebrovascular carbon dioxide reactivity, and autoregulation.

### Patients and Methods

The study was approved by the Ethics Committee for Human Study of Nagasaki University School of Medicine, and informed consent was obtained from each patient. Twenty patients scheduled for minor nonneu-

\*Staff Anesthesiologist.

†Assistant Professor.

‡Associate Professor.

§Professor and Chair, Department of Anesthesiology, Nagasaki University School of Medicine.

Received from the Department of Anesthesiology, Nagasaki University School of Medicine, Nagasaki, Japan. Submitted for publication January 23, 1996. Accepted for publication June 16, 1996. Presented in part at the annual meeting of the American Society of Anesthesiologists, San Francisco, California, October 15-19, 1994.

Address reprint requests to Dr. Cho: Department of Anesthesiology, Nagasaki University School of Medicine, 1-7-1 Sakamoto, Nagasaki 852, JAPAN.



rologic elective surgery were studied in either experiment 1 or 2. In experiment 1, 14 healthy patients (five men and nine women) with a mean age of  $33 \pm 7$  years (SD) and a mean weight of  $55 \pm 11$  kg were studied; in experiment 2, six healthy patients (three men and three women) with a mean age of  $29 \pm 4$  years and a mean weight of  $59 \pm 9$  kg were studied. No preanesthetic medication was administered. Monitoring equipment included a radial artery catheter for direct arterial blood pressure measurement, a pulse oximeter, and an electrocardiograph. End-tidal carbon dioxide (ETCO<sub>2</sub>) tension and nitrous oxide and sevoflurane concentrations were measured using a CAPNOMAC multigas analyzer (Datex, Helsinki, Finland) that was calibrated before the study. A rectal thermistor probe was placed after anesthesia was induced. Body temperature was maintained between 36 and 37°C using a warming blanket.

#### *Middle Cerebral Artery Flow Velocity Measurements*

Methods have been reported previously.<sup>7</sup> Briefly, the MCA flow velocity was measured continuously using a pulsed 2-MHz transcranial Doppler ultrasound (TC2-64B; EME, Uberlingen, Germany), which operates with a maximum of 100 mW/cm<sup>2</sup> ultrasonic intensity and pulse repetition frequencies between 4.96 and 20.52 kHz. Bidirectional signals were recorded with a 10-kHz low-pass filter and a 150-Hz high-pass filter. The Doppler probe was positioned at the right temporal scalp surface and was fixed at the site of best insonation. Transcranial Doppler ultrasound signals of the MCA were identified at a depth of 45 to 50 mm. The time-mean MCA flow velocity (Vmca) was computed by the instrument using a fast-four real-time frequency analysis. The Vmca values were obtained only during end-expiration to avoid respiratory fluctuations.

#### *Experiment 1: Vmca and Carbon Dioxide Reactivity*

Flow velocity of MCA in response to changes in ETCO<sub>2</sub> was determined in 14 patients under the following three states: (1) when patients were awake; (2) with 2% (1.2 MAC) sevoflurane; and (3) with 1.2 MAC sevoflurane-60% nitrous oxide. Measurements during the awake state were taken before anesthesia was induced, and the measurements during anesthetic state were done after the tracheal intubation but before surgery to avoid the influence of surgical stimulation.

Awake control carbon dioxide reactivity was ob-

tained in the patients breathing through a mouthpiece and wearing a nose clip using a Mapleson D breathing system. End-tidal carbon dioxide tension was monitored in the expiratory limb of the breathing circuit close to the patient's mouth. All patients breathed 100% oxygen during normocapnic and hypocapnic states. After the patients were acclimated to the breathing system for 10 to 15 min, Vmca in normocapnia was measured. The fresh gas flow then was increased and intentional hyperventilation was maintained for 5 min. At least three Vmca values in hypocapnia were measured. Five minutes after recovery of normocapnia under spontaneous ventilation, hypercapnia was induced by having the patients breathe a mixture of 95% oxygen-5% carbon dioxide, which was maintained for 5 min to measure the minimum of three Vmca in hypercapnia. Determinations of Vmca were always made after a steady ETCO<sub>2</sub> was obtained for at least five respiratory cycles.

Five minutes after recovery of normocapnia under spontaneous ventilation, anesthesia was induced with inhalation of a mixture of sevoflurane-nitrous oxide-oxygen through a face mask using an F breathing system, and tracheal intubation was facilitated with 0.15 mg/kg intravenous vecuronium bromide. During anesthetic induction, approximately 500 ml lactated Ringer's solution was infused to avoid hypotension; after induction, lactated Ringer's solution was infused at a rate of 3 ml · kg<sup>-1</sup> · h<sup>-1</sup> until all the measurements were made.

After tracheal intubation, measurements were taken while the patients were under anesthesia. Patients were randomly allocated to one of two groups. In group A (n = 7), measurements during 1.2 MAC sevoflurane and then 1.2 MAC sevoflurane-60% nitrous oxide were made. In group B (n = 7), measurements were made during 1.2 MAC sevoflurane-60% nitrous oxide followed by 1.2 MAC sevoflurane.

Before the 1.2 MAC sevoflurane measurements, 1.2 MAC sevoflurane-100% oxygen was maintained for at least 15 min during normocapnia. Before the 1.2 MAC sevoflurane-60% nitrous oxide measurements, a mixture of 1.2 MAC sevoflurane, 60% nitrous oxide, and 40% oxygen was maintained for at least 15 min during normocapnia. After the measurements during normocapnia, hypocapnia was induced. After the measurements during hypocapnia, 5 min of normocapnia was maintained before hypercapnia was induced. Hypocapnia and hypercapnia were induced by changing the respiratory rate under a constant tidal volume, and at



## SEVOFLURANE AND MIDDLE CEREBRAL ARTERY FLOW VELOCITY

**Table 1. Experimental Sequence in Experiment 1**

| Group     | Measurement |                         |                         |
|-----------|-------------|-------------------------|-------------------------|
|           | First       | Second                  | Third                   |
| A (n = 7) | Awake       | Sevo                    | Sevo + N <sub>2</sub> O |
| B (n = 7) | Awake       | Sevo + N <sub>2</sub> O | Sevo                    |

Awake = awake state; Sevo = 1.2 MAC sevoflurane state; Sevo + N<sub>2</sub>O = 1.2 MAC sevoflurane-60% N<sub>2</sub>O state.

least three *Vmca* values were measured during hypocapnia and hypercapnia. The protocol was identical in groups A and B except that the order of 1.2 MAC sevoflurane and 1.2 MAC sevoflurane-60% nitrous oxide was reversed (table 1).

*Experiment 2: Vmca and Autoregulation*

In six other patients, *Vmca* in response to changes in mean arterial blood pressure (MAP) was determined during normocapnia under the following three conditions: (1) while patients were awake; (2) with 1.2 MAC sevoflurane; and (3) with 1.2 MAC sevoflurane-60% nitrous oxide. As in experiment 1, measurements during the awake state were performed before anesthesia was induced, and the measurements during anesthesia were done after tracheal intubation but before surgery.

Awake control data were obtained with the patients breathing 100% oxygen through a mouthpiece and wearing a nose clip using a Mapleson D breathing system. End-tidal carbon dioxide tension was monitored in the expiratory limb of the breathing circuit close to the patient's mouth. After the patients were acclimated to the breathing system for 10 to 15 min, *Vmca* in normocapnia was measured. Mean arterial blood pressure was increased by approximately 20 mmHg for 3 to 5 min by the intravenous infusion of phenylephrine, and then *Vmca* was measured in each patient.

Ten minutes after recovery, anesthesia was induced with inhalation of a mixture of sevoflurane, nitrous oxide, and oxygen through a face mask using an F breathing system. After tracheal intubation, the *Vmca* response to changes in MAP was determined during 1.2 MAC sevoflurane and 1.2 MAC sevoflurane-60% nitrous oxide in the same manner as when patients were awake.

*Data Analysis*

Data are expressed as mean  $\pm$  SD. All variables of patients in groups A and B were compared using Stu-

dent's *t* test. In experiments 1 and 2, all variables were analyzed using a repeated-measure analysis of variance. When significance was found, Tukey's test was used. The paired *Vmca*-ETCO<sub>2</sub> determinations were fitted to both exponential and linear regression analysis to determine the best fit for the relationship. A probability value of less than 0.05 was regarded as significant.

**Results***Experiment 1*

There were no significant differences between groups A and B concerning any of the measured variables, and thus mean and SD values represent the pooled data from each group. The mean hematocrit concentration in arterial blood measured just before the awake state measurements, during the anesthetic state measurements, and at the end of the measurements were  $41 \pm 5\%$  (SD),  $38 \pm 3\%$ , and  $37 \pm 2\%$ , respectively, with no significant differences among them. The body temperature of the patients was maintained between  $36 \pm 1^\circ\text{C}$ . The differences between PaCO<sub>2</sub> and ETCO<sub>2</sub> values just before and after the awake state measurements and anesthetic state measurements were within 1.5 mmHg. Table 2 shows the MAP and heart rate during the experiments. There were no significant differences among the three experimental states. Because the MAP decreased to less than 60 mmHg under anesthesia with 1.2 MAC sevoflurane-60% nitrous oxide in one patient in group A and in two patients in group B, they required continuous intravenous administration of phenylephrine.

Table 2 and figure 1 show *Vmca* and ETCO<sub>2</sub> during hypocapnia, normocapnia, and hypercapnia under the three experimental conditions. Compared with the awake value at each level of ETCO<sub>2</sub>, 1.2 MAC sevoflurane significantly reduced *Vmca*, but there was no significant difference in *Vmca* between 1.2 MAC sevoflurane-60% nitrous oxide and awake values.

Linear regression analysis demonstrated a close relationship between ETCO<sub>2</sub> and *Vmca*, with correlation coefficients of more than 0.95, and was used for subsequent comparisons. The carbon dioxide reactivity slopes derived by linear regression analysis for the awake, 1.2 MAC sevoflurane, and 1.2 MAC sevoflurane-60% nitrous oxide conditions were  $2.5 \pm 0.5$  (SD),  $2.2 \pm 0.4$ , and  $2.5 \pm 0.3$  (cm $\cdot$ s<sup>-1</sup> $\cdot$ mmHg<sup>-1</sup>). There were no significant differences among them.



**Table 2. Mean Arterial Blood Pressure (MAP), Heart Rate (HR), End-Tidal CO<sub>2</sub> (ET<sub>CO<sub>2</sub></sub>), and Time-Mean Middle Cerebral Artery Flow Velocity (V<sub>mca</sub>) during Hypocapnia, Normocapnia, and Hypercapnia under the Three Experimental Conditions**

|                                     | Awake      |             |             | 1.2 MAC Sevo |             |             | 1.2 MAC Sevo + N <sub>2</sub> O |             |             |
|-------------------------------------|------------|-------------|-------------|--------------|-------------|-------------|---------------------------------|-------------|-------------|
|                                     | Hypocapnia | Normocapnia | Hypercapnia | Hypocapnia   | Normocapnia | Hypercapnia | Hypocapnia                      | Normocapnia | Hypercapnia |
| MAP (mmHg)                          | 82 ± 13    | 83 ± 12     | 82 ± 11     | 73 ± 8       | 76 ± 10     | 78 ± 10     | 72 ± 10                         | 72 ± 11     | 73 ± 11     |
| HR (beats/min)                      | 77 ± 8     | 74 ± 14     | 71 ± 6      | 67 ± 11      | 66 ± 10     | 67 ± 10     | 67 ± 11                         | 67 ± 10     | 69 ± 9      |
| ET <sub>CO<sub>2</sub></sub> (mmHg) | 31 ± 2     | 41 ± 3      | 51 ± 2      | 31 ± 1       | 40 ± 1      | 50 ± 2      | 30 ± 1                          | 39 ± 3      | 51 ± 1      |
| V <sub>mca</sub> (cm/s)             | 52 ± 9     | 69 ± 9      | 97 ± 11     | 33 ± 6*      | 55 ± 8*     | 78 ± 10*    | 45 ± 10†                        | 70 ± 9†     | 93 ± 10†    |

Values are mean ± SD. Awake = awake state; 1.2 MAC Sevo = 1.2 MAC sevoflurane state; 1.2 MAC Sevo + N<sub>2</sub>O = 1.2 MAC sevoflurane-60% N<sub>2</sub>O state. V<sub>mca</sub> values in hypercapnia > normocapnia > hypocapnia for all study conditions ( $P < 0.05$ ).

\* Significantly different from awake values ( $P < 0.05$ ).

† Significantly different 1.2 MAC Sevo values versus 1.2 MAC Sevo + N<sub>2</sub>O.

### Experiment 2

The mean hematocrit concentration in arterial blood determined just before the awake state and anesthetic state measurements and at the end of the measurements were  $42 \pm 4\%$  (SD),  $38 \pm 4\%$ , and  $37 \pm 2\%$ , respectively, with no significant differences among them. The body temperature of the patients was maintained between  $36 \pm 0.8^\circ\text{C}$ . The differences between Pa<sub>CO<sub>2</sub></sub> and ET<sub>CO<sub>2</sub></sub> values just before and after the awake measurements and anesthetic condition measurements were within 1.5 mmHg. The MAP before phenyleph-

rine treatment was more than 60 mmHg in all patients. As shown in table 3, intravenous infusion of phenylephrine increased MAP by approximately 20 mmHg and decreased heart rate by approximately 15 bpm in each experimental state. There was no significant change in V<sub>mca</sub> or ET<sub>CO<sub>2</sub></sub> during phenylephrine infusion.

### Discussion

The effects of halothane, enflurane, and isoflurane on cerebral circulation have been studied extensively in animals<sup>8-10</sup> and in humans.<sup>11</sup> Researchers report that these anesthetics have cerebral vasodilator properties that are dose dependent, and that isoflurane is a less-potent cerebral vasodilator.<sup>8,9</sup> The present results show that 1.2 MAC sevoflurane reduces V<sub>mca</sub> compared with the awake value at each level of ET<sub>CO<sub>2</sub></sub>. Our data also show that cerebrovascular carbon dioxide reactivity is well maintained during 1.2 MAC sevoflurane anesthesia.

Manohar<sup>1</sup> reported that 1 MAC sevoflurane decreased CBF and CMRO<sub>2</sub> compared with an awake, nonanesthetized control state by approximately 30% and 50% in pigs, respectively. Scheller and associates<sup>2</sup> observed that CBF remained unchanged but that CMRO<sub>2</sub> was reduced significantly in rabbits under 1.0 MAC sevoflurane during morphine-nitrous oxide anesthesia. They also found that 0.5 to 2.14 MAC sevoflurane had minimal effects on CBF but significantly reduced CMRO<sub>2</sub> in dogs.<sup>3</sup> Takahashi and colleagues<sup>12</sup> reported that 0.5 to 1.5 MAC sevoflurane with 70% nitrous oxide did not increase intracranial pressure during established hypocapnia in dogs, in contrast with halothane and enflurane. Crawford and associates<sup>13</sup> demonstrated

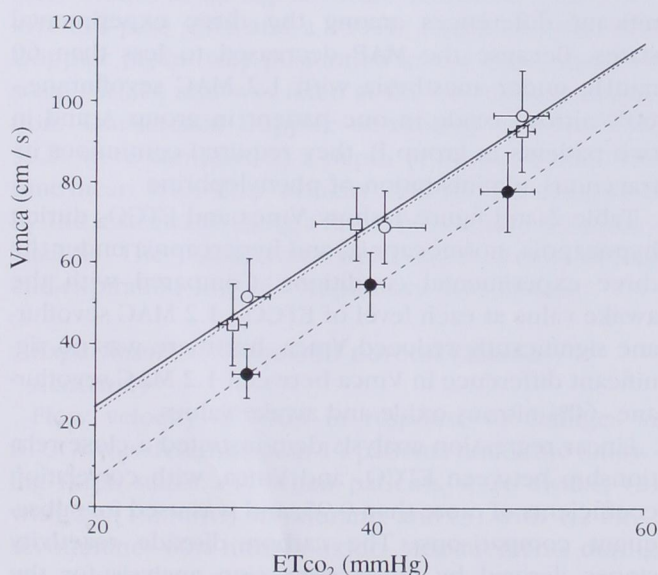

**Fig. 1. Middle cerebral artery flow velocity and end-tidal carbon dioxide tension during hypocapnia, normocapnia, and hypercapnia under three experimental conditions. ○ Awake. ● 1.2 MAC sevoflurane. □ 1.2 MAC sevoflurane-60% nitrous oxide.**



## SEVOFLURANE AND MIDDLE CEREBRAL ARTERY FLOW VELOCITY

Table 3. Mean Arterial Blood Pressure, Heart Rate,  $ET_{CO_2}$ , and  $V_{mca}$  under the Three Experimental Conditions

|                                          | Prephenylephrine |         |             |           | Postphenylephrine |          |             |           |
|------------------------------------------|------------------|---------|-------------|-----------|-------------------|----------|-------------|-----------|
|                                          | MAP              | HR      | $ET_{CO_2}$ | $V_{mca}$ | MAP               | HR       | $ET_{CO_2}$ | $V_{mca}$ |
| Awake                                    | 87 ± 4           | 73 ± 7  | 38 ± 3      | 62 ± 12   | 111 ± 13*         | 58 ± 5*  | 38 ± 4      | 60 ± 12   |
| 1.2 MAC sevoflurane                      | 73 ± 11          | 62 ± 6† | 38 ± 3      | 41 ± 12†  | 98 ± 13*†         | 48 ± 4*† | 37 ± 3      | 42 ± 12†  |
| 1.2 MAC sevoflurane-60% N <sub>2</sub> O | 70 ± 10†         | 62 ± 5† | 38 ± 3      | 55 ± 10   | 89 ± 10*†         | 53 ± 6*  | 37 ± 3      | 55 ± 9    |

Values are mean ± SD. MAP = mean arterial pressure (mmHg); HR = heart rate (beats/min).

\* Significantly different from prephenylephrine values ( $P < 0.05$ ).

† Significantly different from awake values ( $P < 0.05$ ).

that in rats, compared with an awake, nonanesthetized control state, CBF remained unchanged under 0.5 and 1.0 MAC sevoflurane but increased by 61% and 120%, respectively, under 1.2 and 1.5 MAC sevoflurane. However, the influence of hypercapnia on the CBF could not be excluded in their study because the rats were spontaneously ventilated.

In clinical studies, Kitaguchi and associates<sup>4</sup> investigated the effects of sevoflurane on cerebral circulation in patients with ischemic cerebrovascular disease using the Kety-Schmidt technique with argon. They reported that CBF and  $CMRO_2$  in sevoflurane anesthesia were  $28 \text{ ml} \cdot 100 \text{ mg}^{-1} \cdot \text{min}^{-1}$  and  $1.34 \text{ ml} \cdot 100 \text{ mg}^{-1} \cdot \text{min}^{-1}$ , respectively, and that carbon dioxide reactivity of CBF was well maintained. In their separate study,<sup>14</sup> CBF and  $CMRO_2$  in awake patients with ischemic cerebrovascular disease were  $42.3 \text{ ml} \cdot 100 \text{ mg}^{-1} \cdot \text{min}^{-1}$  and  $2.81 \text{ ml} \cdot 100 \text{ mg}^{-1} \cdot \text{min}^{-1}$ , respectively. Thus CBF and  $CMRO_2$  during sevoflurane anesthesia were 34% and 52% less, respectively, than those in awake patients.

Researchers report that nitrous oxide dilates cerebral vasculature in combination with inhaled anesthetics.<sup>15-17</sup> We examined the effects of the addition of nitrous oxide to sevoflurane. Our results show that 1.2 MAC sevoflurane-60% nitrous oxide has little effect on MCA flow velocity and that cerebrovascular carbon dioxide reactivity and autoregulation are well maintained during 1.2 MAC sevoflurane-60% nitrous oxide anesthesia. The present results correlate with those of Manohar and Parks,<sup>16</sup> who found that sevoflurane reduced CBF relative to the awake situation, whereas the addition of nitrous oxide caused CBF values to return toward those in the awake condition in pigs.

Autoregulation of CBF refers to alterations in cerebral vascular resistance in response to perfusion pressure. If autoregulation of CBF works well, CBF does not change when the cerebral perfusion pressure increases or decreases within a certain range. Miletich and associates<sup>10</sup>

reported that because halothane and enflurane increased CBF by dilatation of cerebral vasculature, autoregulation of CBF was absent during anesthesia with these agents. Isoflurane was reported to have a weaker cerebral vasodilating action than halothane.<sup>8</sup> Todd and Drummond<sup>9</sup> observed the cerebrovascular and metabolic effects of halothane and isoflurane in cats and concluded that isoflurane had a smaller effect on autoregulation of CBF compared with halothane. The present results show that cerebrovascular autoregulation is well maintained during anesthesia with 1.2 MAC sevoflurane or a mixture of 1.2 MAC sevoflurane and 60% nitrous oxide.

The patients were divided into two groups in experiment 1 to avoid the time effect of volatile anesthesia. The results showed that the experimental sequence of sevoflurane and sevoflurane-nitrous oxide states had no influence on the measured parameters. Thus we considered that the order of the experimental states did not introduce significant bias and did not use the reversed order in experiment 2.

The MAP decreased to less than 60 mmHg during 1.2 MAC sevoflurane-60% nitrous oxide anesthesia, and continuous intravenous administration of phenylephrine was required in three patients in experiment 1. It does not seem possible that phenylephrine infusion might have influenced the measured  $V_{mca}$ , because the dose of phenylephrine was the minimum necessary to maintain MAP at levels greater than 60 mmHg; furthermore, the phenylephrine-induced increased MAP did not influence  $V_{mca}$  during 1.2 MAC sevoflurane or 1.2 MAC sevoflurane-60% nitrous oxide anesthesia in experiment 2.

It is unlikely that preoperative anxiety might have spuriously increased the baseline  $V_{mca}$  in the present study because no preanesthetic medication was varied. The normal  $V_{mca}$  during the awake resting state varies from 35 to 90, with an average value of  $60 \text{ cm} \cdot \text{s}^{-1}$ ,<sup>18</sup>



and our results are consistent with these values as the  $V_{mca}$  in normocapnia under awake state in experiments 1 and 2 were  $69 \pm 9$  and  $62 \pm 12 \text{ cm} \cdot \text{s}^{-1}$ .

Sevoflurane reduced  $V_{mca}$  compared with the awake condition, whereas the addition of nitrous oxide caused  $V_{mca}$  to increase toward the awake condition. The cerebrovascular carbon dioxide reactivity and autoregulation were well maintained during sevoflurane with and without nitrous oxide anesthesia.

## References

1. Manohar M: Regional brain blood flow and cerebral cortical  $O_2$  consumption during sevoflurane anesthesia in healthy isocapnic swine. *J Cardiovasc Pharmacol* 1986; 8:1268-75
2. Scheller MS, Tateishi A, Drummond JC, Zornow MH: The effects of sevoflurane on cerebral blood flow, cerebral metabolic rate for oxygen, intracranial pressure, and the electroencephalogram are similar to those of isoflurane in the rabbit. *ANESTHESIOLOGY* 1988; 68:548-51
3. Scheller MS, Nakakimura K, Fleischer JE, Zornow MH: Cerebral effects of sevoflurane in the dog: Comparison with isoflurane and enflurane. *Br J Anaesth* 1990; 65:388-92
4. Kitaguchi K, Oshumi H, Kuro M, Nakajima T, Hayashi Y: Effects of sevoflurane on cerebral circulation and metabolism in patients with ischemic cerebrovascular disease. *ANESTHESIOLOGY* 1993; 79:704-9
5. Kochs E, Hoffman WE, Werner C, Albrecht RF, Esch JS: Cerebral blood flow velocity in relation to cerebral blood flow, cerebral metabolic rate for oxygen, and electroencephalogram analysis during isoflurane anesthesia in dogs. *Anesth Analg* 1993; 76:1222-6
6. Kirkham FJ, Padayachee TS, Parsons S, Seargeant LS, House FR, Gosling RG: Transcranial measurement of blood velocities in the basal cerebral arteries using pulsed Doppler ultrasound: Velocity as an index of flow. *Ultrasound Med Biol* 1986; 12:15-21
7. Aaslid R: Transcranial Doppler examination techniques, Transcranial Doppler Sonography. Edited by R. Aaslid. New York, Springer-Verlag, 1986, p 56
8. Drummond JC, Todd MM, Scheller MS, Shapiro HM: A comparison of the direct cerebral vasodilating potencies of halothane and isoflurane in the New Zealand white rabbit. *ANESTHESIOLOGY* 1986; 65:462-7
9. Todd MM, Drummond JC: A comparison of the cerebrovascular and metabolic effects of halothane and isoflurane in the cats. *ANESTHESIOLOGY* 1984; 60:276-82
10. Miletich DJ, Ivankovich AD, Albrecht RF, Reimann CR, Rosenberg R, Mckissic ED: Absence of autoregulation of cerebral blood flow during halothane and enflurane anesthesia. *Anesth Analg* 1976; 55:100-9
11. Eintrei C, Leszniewski W, Carlsson C: Local application of  $^{133}\text{Xenon}$  for measurement of regional cerebral blood flow (rCBF) during halothane, enflurane, and isoflurane anesthesia in human. *ANESTHESIOLOGY* 1985; 63:391-4
12. Takahashi H, Murata K, Ikeda K: Sevoflurane does not increase intracranial pressure in hyperventilated dogs. *Br J Anaesth* 1993; 71:551-5
13. Crawford MW, Lerman J, Pilato M, Orrego H, Saldivia V, Carmichael FJ: Haemodynamic and organ blood flow responses to sevoflurane during spontaneous ventilation in the rat: A dose-response study. *Can J Anaesth* 1992; 39:270-6
14. Kuriyama Y, Sawada T, Niimi T, Karasawa J, Kikuchi H, Kuro M, Naritomi H: Monitoring system of cerebral blood flow and cerebral metabolism: Part I. Measurement of cerebral blood flow and cerebral oxygen consumption by use of argon and mass spectrometry in clinical cases. *Kokyu to Junkan-Respiration & Circulation* 1981; 29:147-52
15. Manohar M, Parks CM: Regional distribution of brain and myocardial perfusion in swine while awake and during 1.0 and 1.5 MAC isoflurane anaesthesia produced without or with 50% nitrous oxide. *Cardiovasc Res* 1984; 18:344-53
16. Manohar M, Parks CM: Porcine systemic and regional organ blood flow during 1.0 and 1.5 minimum alveolar concentrations of sevoflurane anesthesia without and with 50% nitrous oxide. *J Pharmacol Exp Ther* 1984; 231:640-8
17. Hansen TD, Warner DS, Todd MM, Vust IJ: Effects of nitrous oxide and volatile anaesthetics on cerebral blood flow. *Br J Anaesth* 1989; 63:290-5
18. Aaslid R, Huber P, Nornes H: Evaluation of cerebrovascular spasm with transcranial Doppler ultrasound. *J Neurosurg* 1984; 60:37-42
